# Supplementary material
Source: PubMed Central journal article supplement (PMC4914616)
Supplement: AAC.02994-15_zac007165289so1.pdf [file AAC.02994-15_zac007165289so1.pdf]

**Supplemental Figure 1. Pulsed-field gel electrophoresis of 17 minocycline-resistant *Acinetobacter***

*baumannii* isolates.

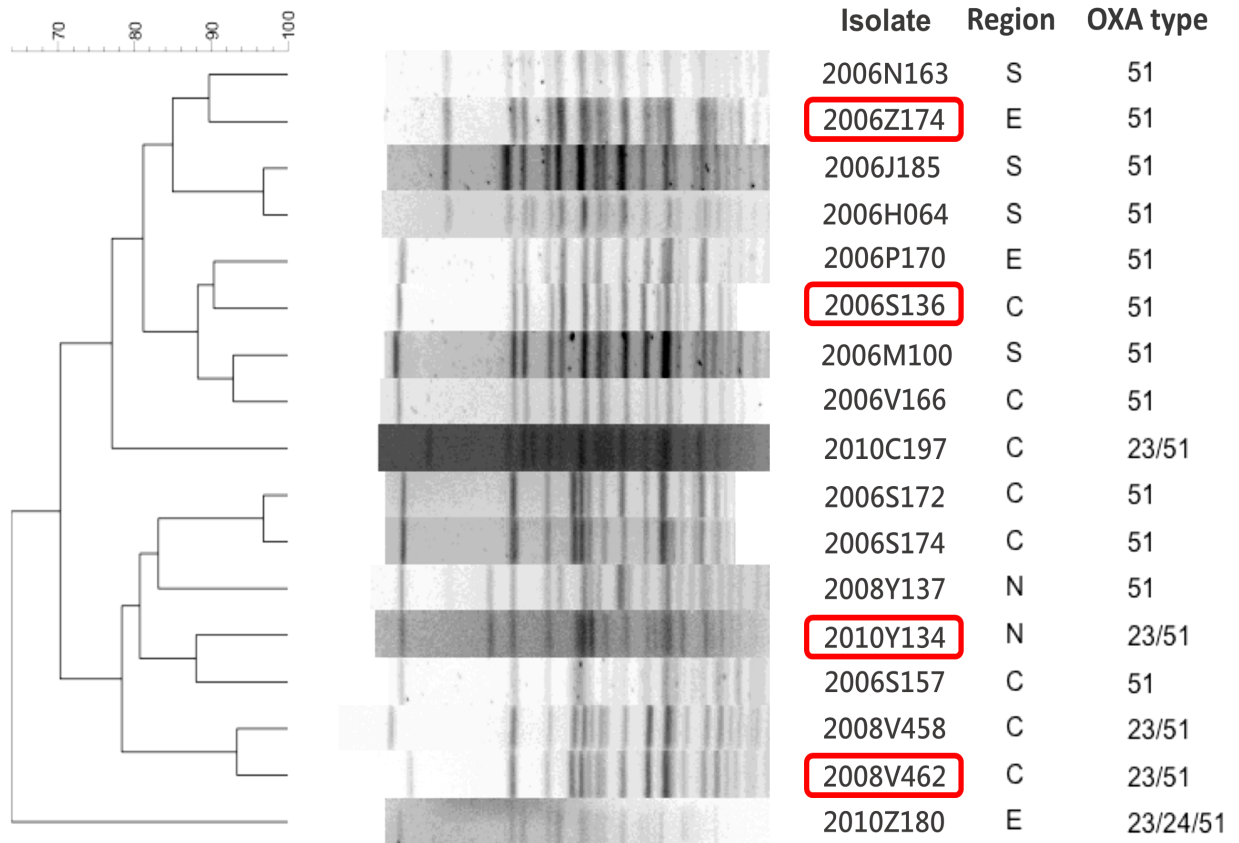

Isolates used in this study are marked by red boxes. S, southern; E, eastern; C, central; N, northern; OXA,

oxacillinase.

Supplemental Figure 2. Quantitative reverse transcription PCR of genes coding for efflux pumps in four minocycline-resistant *Acinetobacter baumannii* isolates.

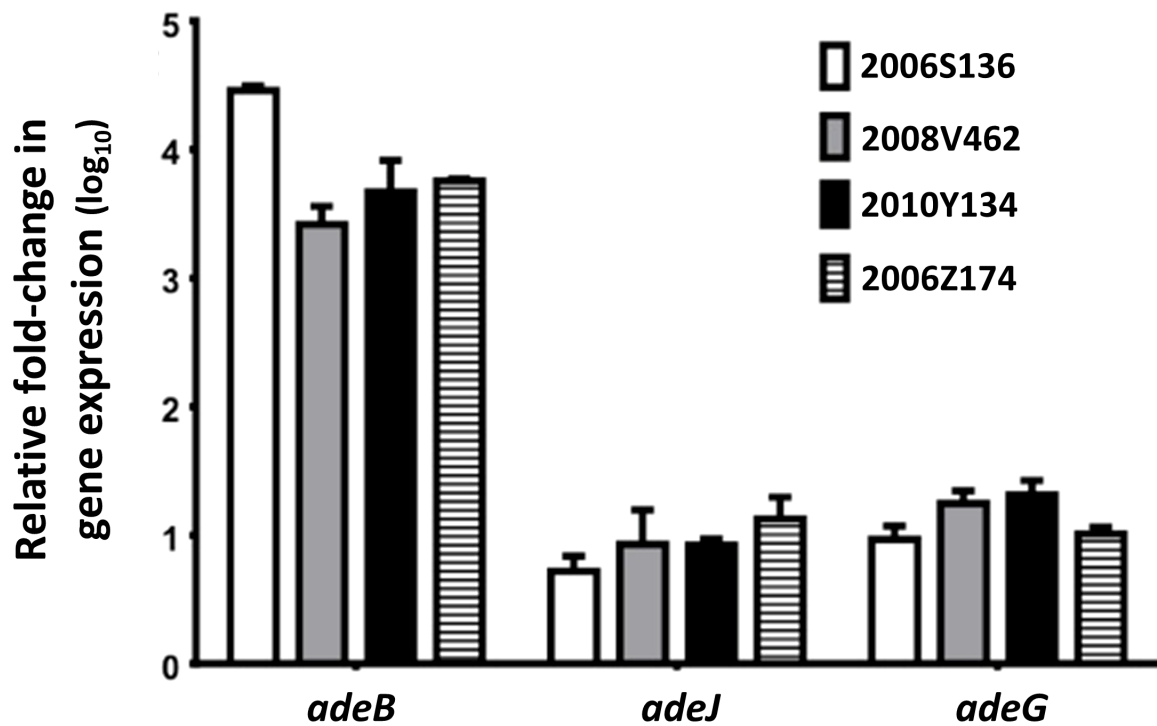

Expression levels were standardized to the transcript levels of the *rpoB* gene for each isolate and considered relative to those in ATCC 17978 (2 delta-delta Ct method).

Supplemental Figure 3. Checkerboard synergy assay.

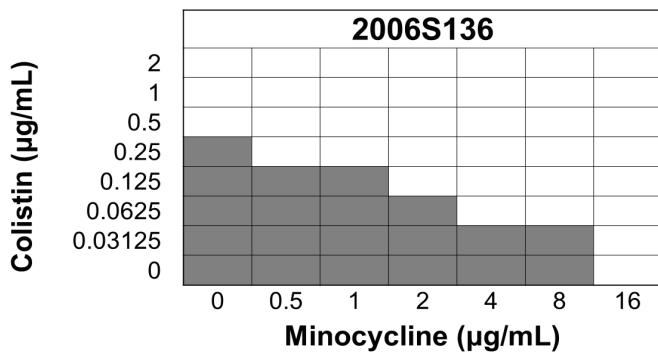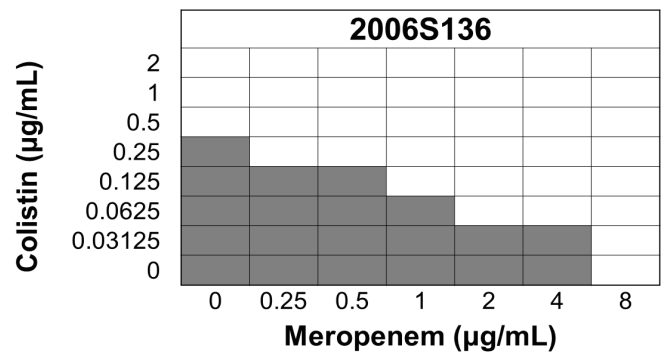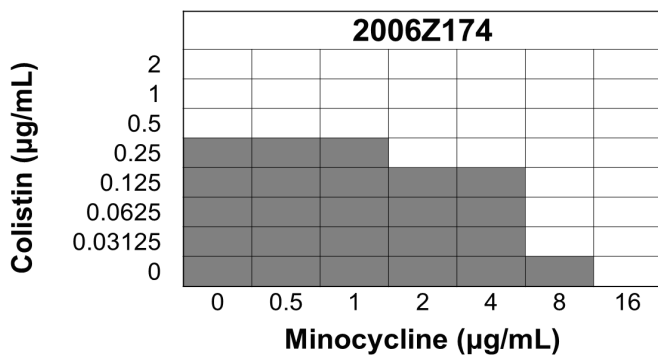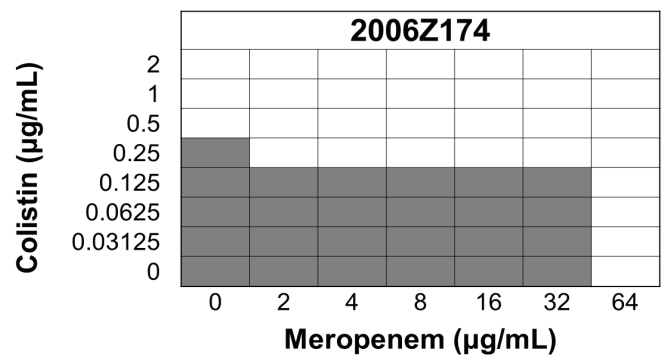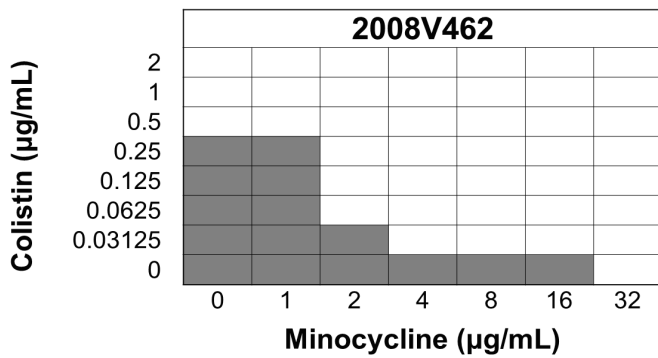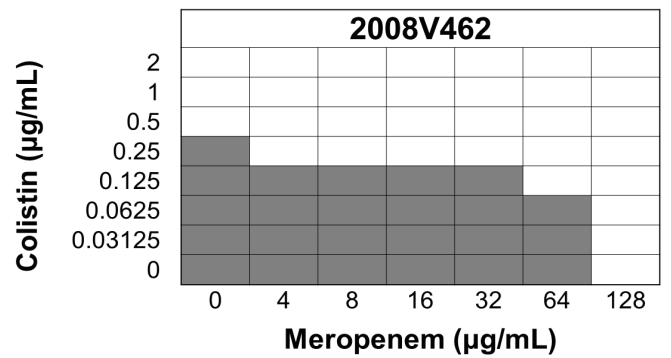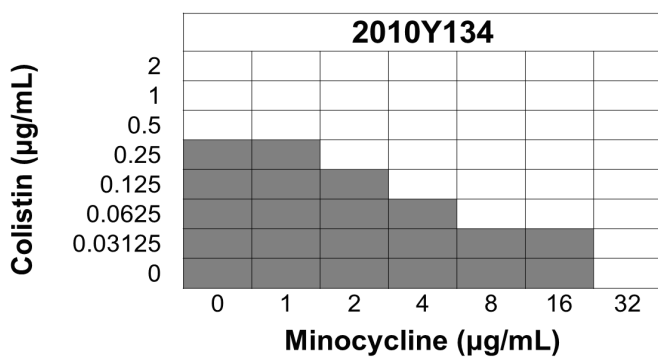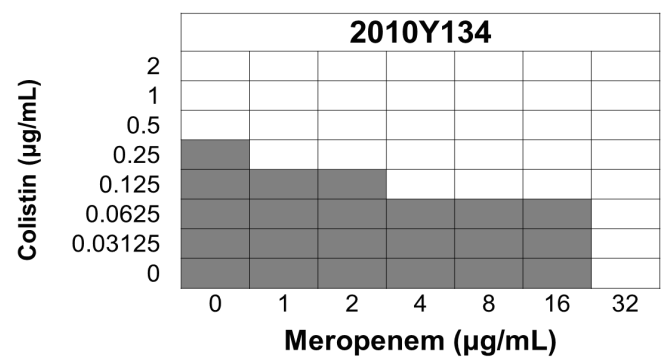

Supplemental Figure 4. Time-kill assays for minocycline-resistant *Acinetobacter baumannii* using minocycline at susceptible breakpoint.

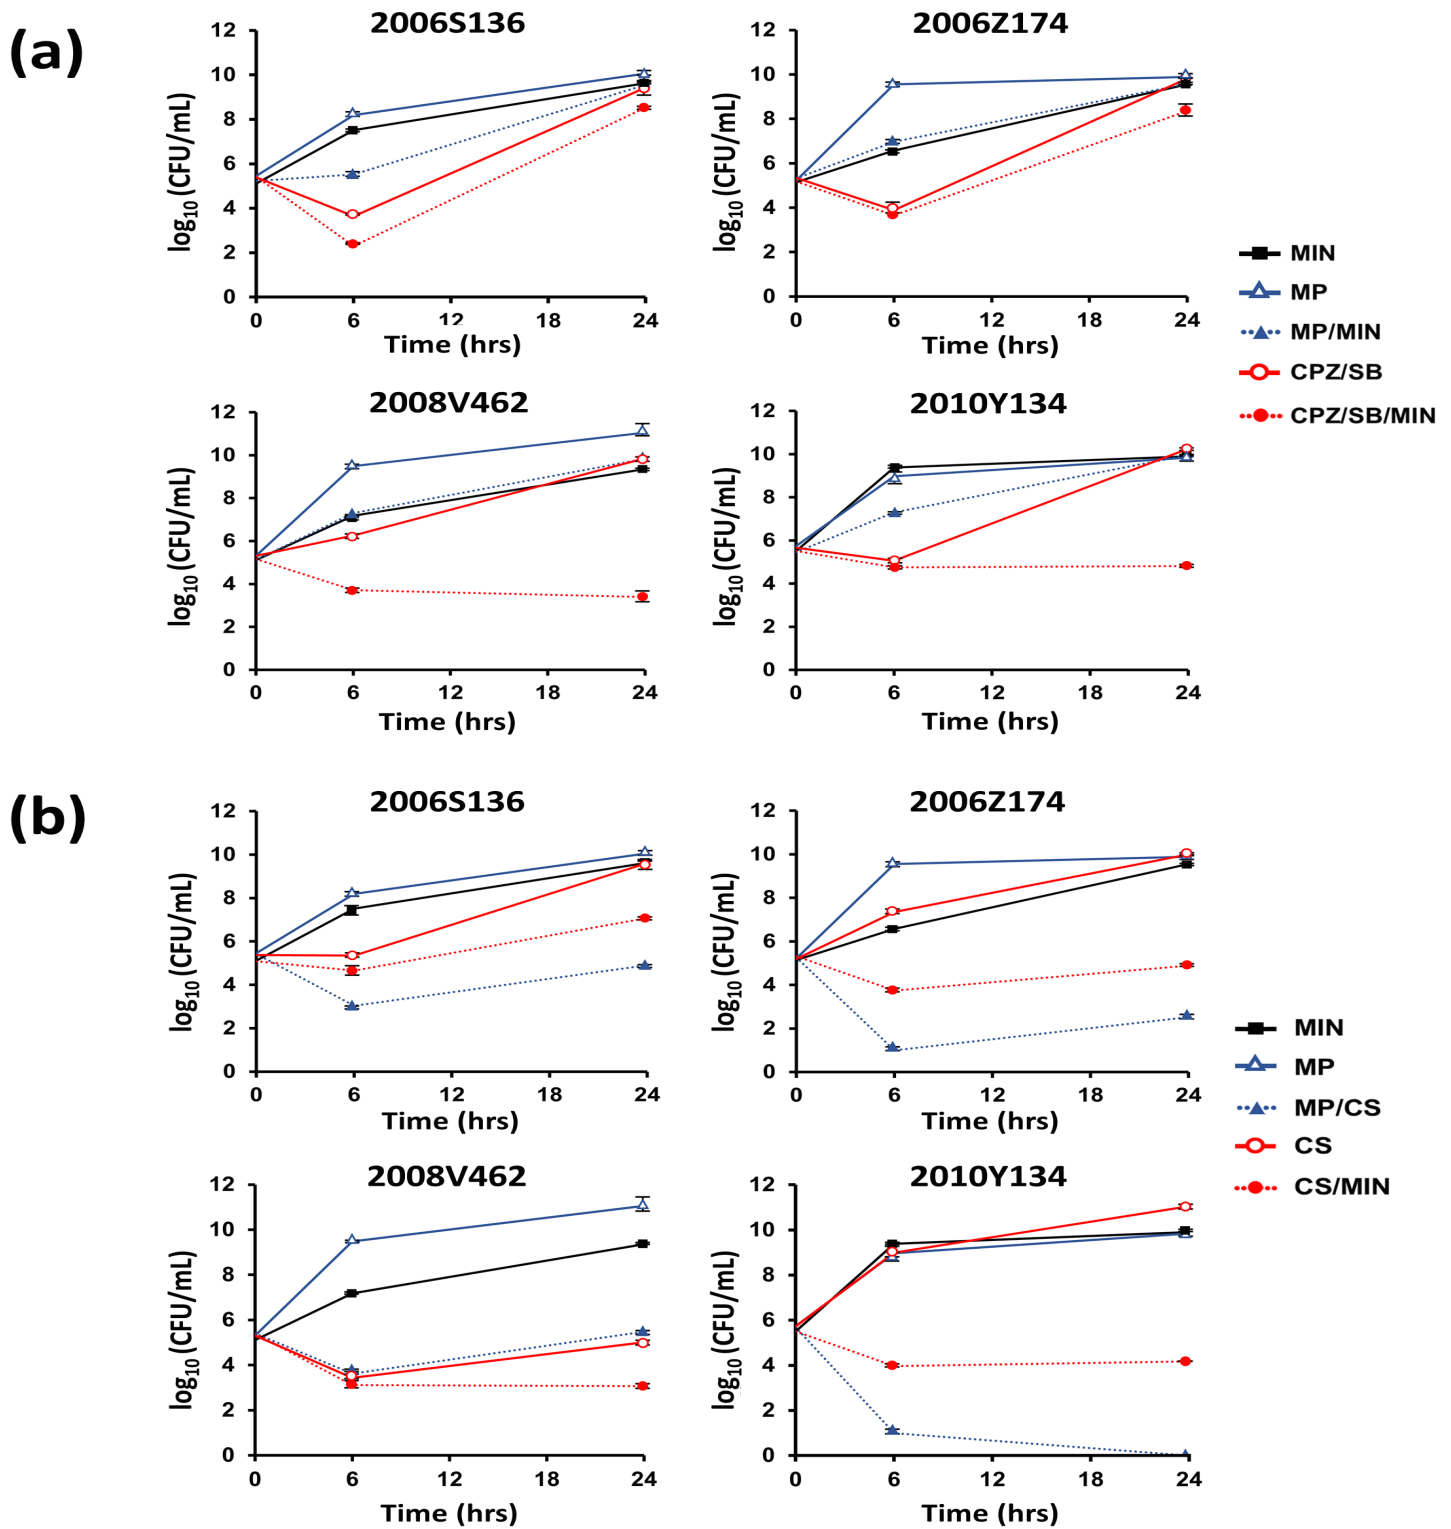

MIN, minocycline (4  $\mu\text{g}/\text{mL}$ ); MP, meropenem (8  $\mu\text{g}/\text{mL}$ ); CPZ/SB, cefoperazone/sulbactam (16/16  $\mu\text{g}/\text{mL}$ ); and CS, colistin (0.5  $\mu\text{g}/\text{mL}$ ).

Supplemental Figure 5. Growth curve for minocycline-resistant *Acinetobacter baumannii*.

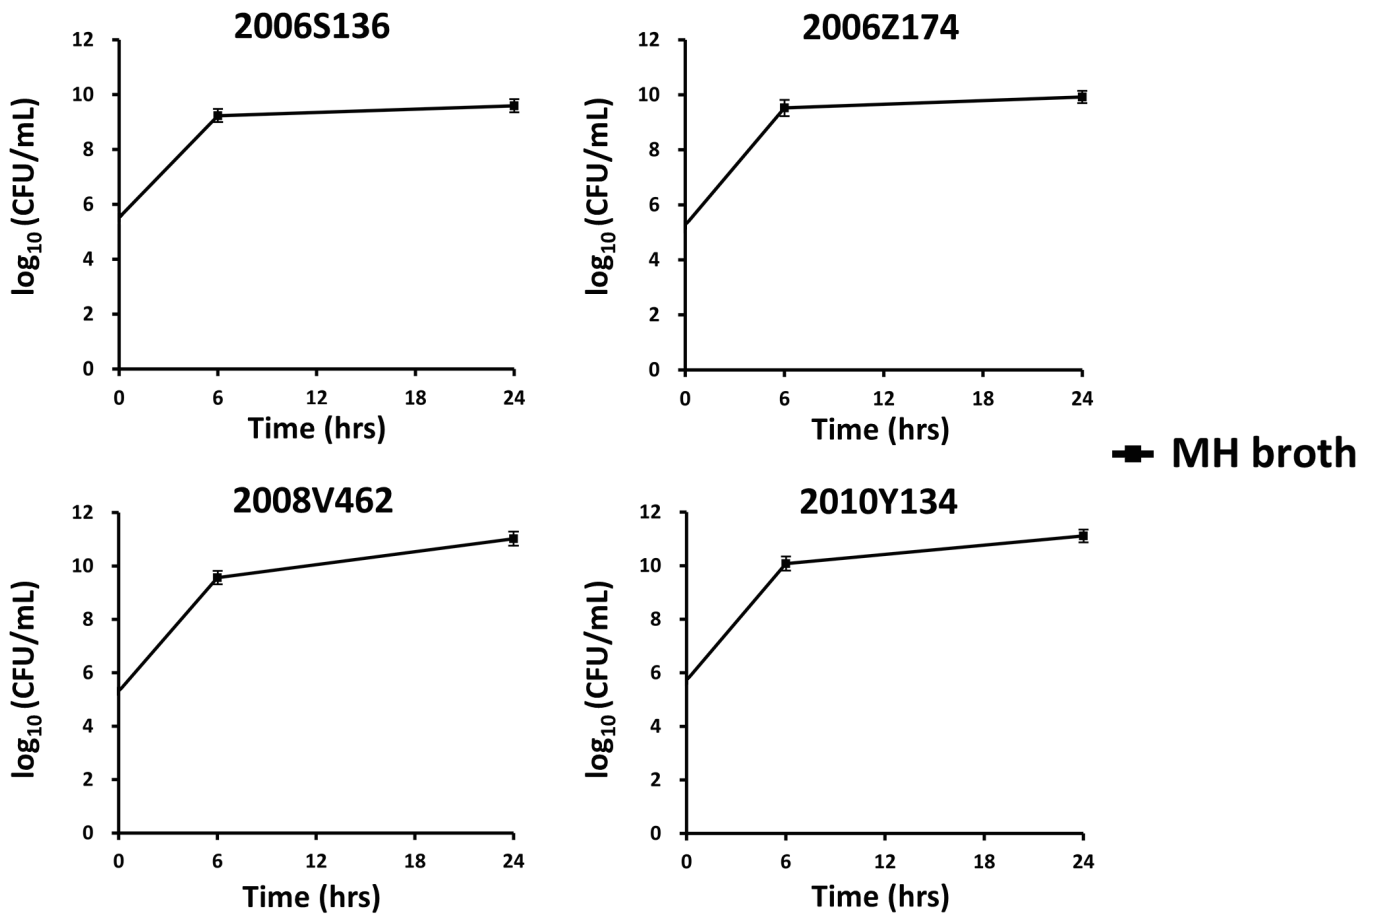

MH broth, Mueller-Hinton broth.
